# Supplementary material for: The activity origin of core–shell and alloy AgCu bimetallic nanoparticles for the oxygen reduction reaction
Source: Royal Society of Chemistry journal article supplement (doi:10.1039/c6ta10948a), 2017-01-01
Supplement: c6ta10948a1.pdf [file c6ta10948a1.pdf]

## Supporting Information

### **Activity origin of core–shell and alloy AgCu bimetallic nanoparticles for oxygen reduction reaction**

Nan Zhang <sup>a</sup>, Fuyi Chen<sup>\*a</sup>, Xiaoqiang Wu <sup>a</sup>, Qiao Wang <sup>a</sup>, Adnan Qaseem <sup>a</sup> and Zhenhai Xia<sup>\*b</sup>

<sup>a</sup> *State Key Laboratory of Solidification Processing, Northwestern Polytechnical University, Xian, 710072, China.*

<sup>b</sup> *Department of Materials Science and Engineering, Department of Chemistry, University of North Texas, Denton, TX 76203, USA.*

<sup>\*</sup>Corresponding author. Tel./fax: +86029-88492052. E-mail address: fuyichen@nwpu.edu.cn (Fuyi Chen)

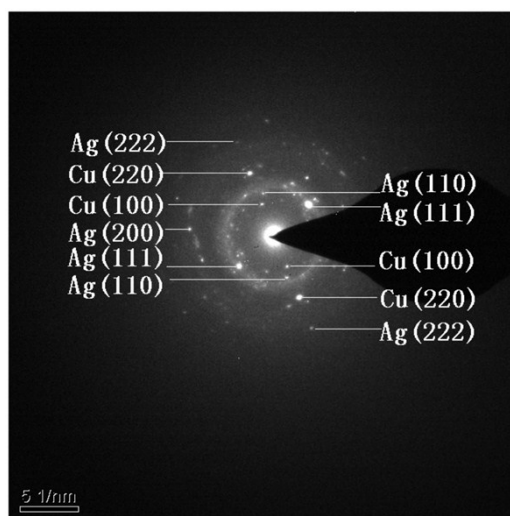

Fig. S1 Selected area diffraction patterns for AgCu nanocrystalline film.

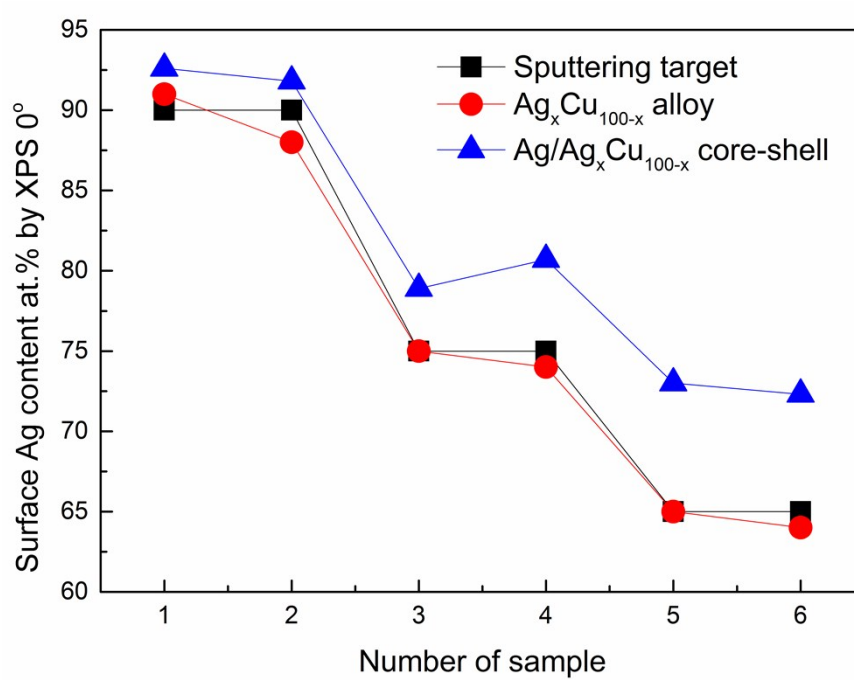

Fig. S2 Surface Ag content of Ag<sub>x</sub>Cu<sub>100-x</sub> and Ag/Ag<sub>x</sub>Cu<sub>100-x</sub> measured by XPS-0°.

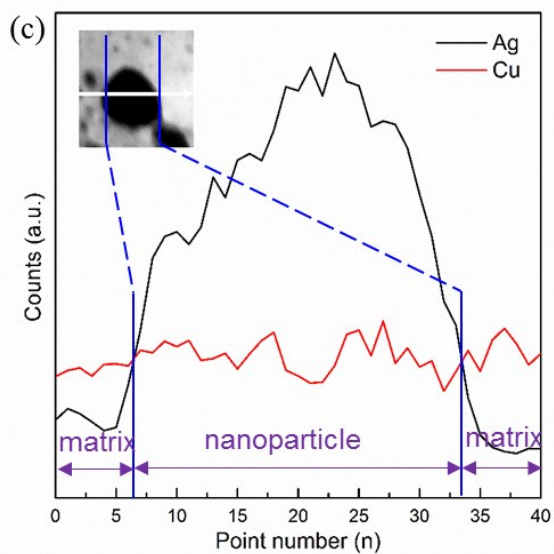

Fig. S3 STEM line-scanning of alloy  $\text{Ag}_3\text{Cu}$  nanoparticles.

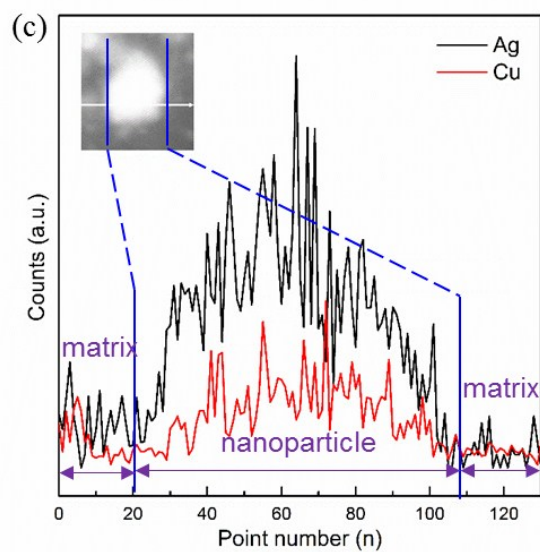

Fig. S4 STEM line-scanning of core-shell  $\text{Ag}/\text{Ag}_3\text{Cu}$  nanoparticles.
